# Supplementary material for: Effect of double mutations T790M/L858R on conformation and drug-resistant mechanism of epidermal growth factor receptor explored by molecular dynamics simulations
Source: Royal Society of Chemistry journal article supplement (doi:10.1039/c8ra06844e), 2018-01-01
Supplement: c8ra06844e1.pdf [file c8ra06844e1.pdf]

***Supporting Information for***

**Effect of Double Mutations T790M/L858R on Conformation and Drug-Resistant Mechanism of Epidermal Growth Factor Receptor Explored by Molecular Dynamics Simulations**

Fangfang Yan<sup>a</sup>, Xinguo Liu<sup>a,\*</sup>, Shaolong Zhang<sup>a</sup>, Jing Su<sup>a</sup>, Qinggang Zhang<sup>a</sup> and Jianzhong Chen<sup>b,\*</sup>

*<sup>a</sup>School of Physics and Electronics, Shandong Normal University, Jinan, 250358, China;*

*<sup>b</sup>School of Science, Shandong Jiaotong University, Jinan, 250357, China*

E-mail: liuxinguo@sdu.edu.cn (X. Liu); chenjianzhong1970@163.com and jzchen@sdjtu.edu.cn (J. Chen).

**Table S1** Energy contributions of individual residues to binding free energy of inhibitors to the WT and T790M/L858R EGFRs<sup>a</sup>

|      |             | TAK-285                 |                         |                             | W2P                     |                         |                             | HKI-272                 |                         |                             |
|------|-------------|-------------------------|-------------------------|-----------------------------|-------------------------|-------------------------|-----------------------------|-------------------------|-------------------------|-----------------------------|
|      |             | $\Delta E_{\text{vdw}}$ | $\Delta E_{\text{ele}}$ | $\Delta G_{\text{ele+pol}}$ | $\Delta E_{\text{vdw}}$ | $\Delta E_{\text{ele}}$ | $\Delta G_{\text{ele+pol}}$ | $\Delta E_{\text{vdw}}$ | $\Delta E_{\text{ele}}$ | $\Delta G_{\text{ele+pol}}$ |
| L718 | WT          | -1.31                   | -0.45                   | 1.00                        | -2.61                   | -0.46                   | 0.80                        | -1.88                   | -0.43                   | 0.20                        |
|      | T790M/L858R | -1.72                   | -0.26                   | 0.83                        | -1.55                   | -0.40                   | 0.98                        | -1.84                   | -0.32                   | 0.18                        |
| V726 | WT          | -2.15                   | -0.33                   | 0.29                        | -1.79                   | -0.47                   | 0.21                        | -1.03                   | -0.37                   | 0.16                        |
|      | T790M/L858R | -1.56                   | -0.17                   | 0.37                        | -1.67                   | -0.13                   | 0.17                        | -1.49                   | -0.57                   | 0.34                        |
| M766 | WT          | -1.03                   | -0.37                   | 0.07                        | ---                     | ---                     | ---                         | -1.19                   | -0.63                   | -0.18                       |
|      | T790M/L858R | -0.65                   | -0.08                   | 0.19                        | ---                     | ---                     | ---                         | -0.68                   | -0.05                   | 0.16                        |
| L777 | WT          | -1.22                   | -0.26                   | 0.09                        | ---                     | ---                     | ---                         | ---                     | ---                     | ---                         |
|      | T790M/L858R | -0.30                   | 0.01                    | 0.10                        | ---                     | ---                     | ---                         | ---                     | ---                     | ---                         |
| L788 | WT          | -1.89                   | -0.06                   | 0.42                        | -1.41                   | -0.31                   | 0.32                        | -1.75                   | -0.10                   | 0.19                        |
|      | T790M/L858R | -1.82                   | 0.32                    | 0.41                        | -1.73                   | -0.00                   | 0.59                        | -1.12                   | -0.21                   | 0.08                        |
| M790 | WT          | -1.79                   | 0.08                    | 0.43                        | -1.50                   | 0.01                    | 0.54                        | -1.39                   | -0.36                   | 0.34                        |
|      | T790M/L858R | -2.12                   | 0.04                    | 0.50                        | -2.24                   | 0.21                    | 0.72                        | -1.96                   | -0.25                   | 0.36                        |
| M793 | WT          | -1.25                   | -2.12                   | -0.10                       | -1.24                   | -2.03                   | 0.19                        | -1.47                   | -3.00                   | 0.06                        |
|      | T790M/L858R | -0.94                   | -2.08                   | -0.03                       | -0.92                   | -1.87                   | 0.21                        | -1.75                   | -2.05                   | 0.43                        |
| G796 | WT          | ---                     | ---                     | ---                         | ---                     | ---                     | ---                         | -1.43                   | 0.24                    | 0.30                        |
|      | T790M/L858R | ---                     | ---                     | ---                         | ---                     | ---                     | ---                         | -1.26                   | 0.19                    | 0.33                        |
| C797 | WT          | ---                     | ---                     | ---                         | -1.29                   | -2.06                   | -0.34                       | -0.92                   | -1.08                   | 0                           |
|      | T790M/L858R | ---                     | ---                     | ---                         | -0.92                   | -0.62                   | 1.13                        | -1.06                   | -0.77                   | 0.16                        |
| L844 | WT          | -2.51                   | -0.19                   | 0.22                        | -2.15                   | 0.44                    | 0.19                        | -2.07                   | 0.47                    | 0.19                        |
|      | T790M/L858R | -1.75                   | -0.08                   | 0.14                        | -1.06                   | 0.48                    | 0.12                        | -1.56                   | 0.62                    | 0.28                        |

<sup>a</sup> All values are given in kcal/mol.

$\Delta E_{\text{vdw}}$ : van der Waals interaction energy.

$\Delta E_{\text{ele}}$ : electrostatic interaction energy.

$$\Delta G_{\text{ele+pol}} = \Delta E_{\text{ele}} + \Delta G_{\text{pol}}$$

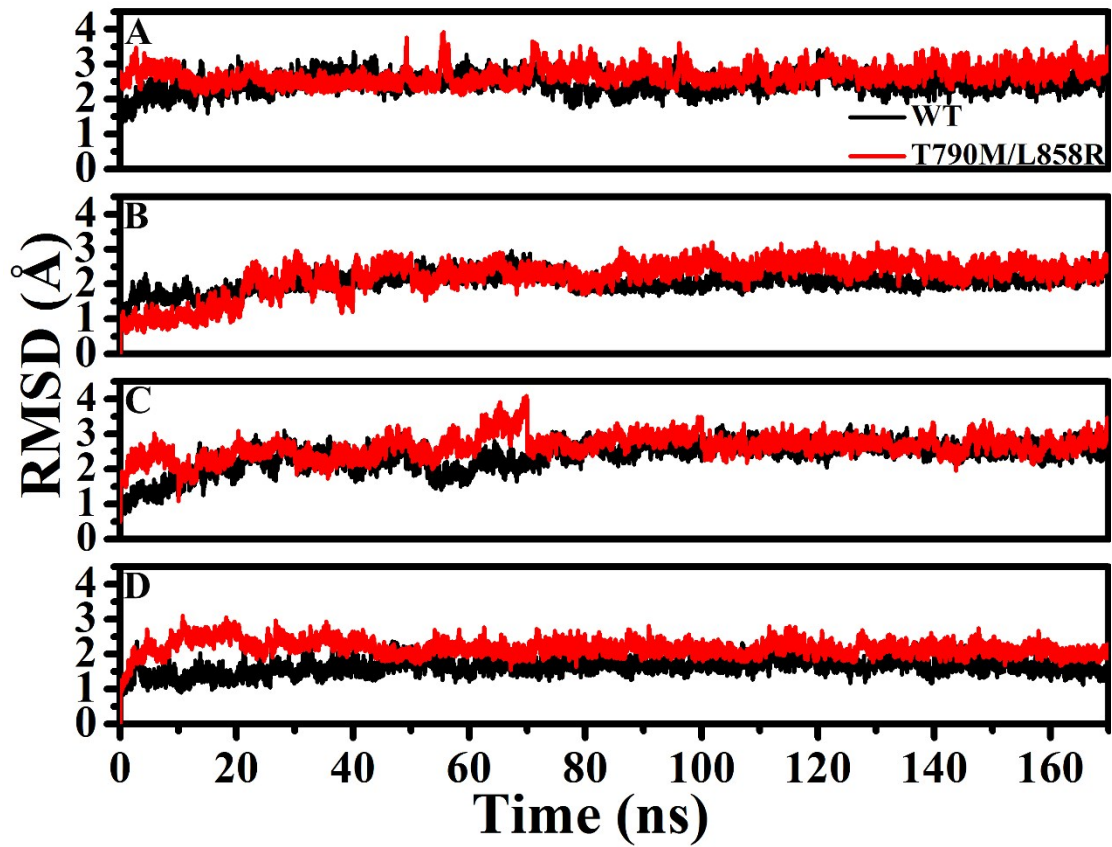

**Fig. S1** Root-mean square displacements (RMSDs) of backbone atoms relative to their initial structures as function of simulated time. The WT and T790M/L858R apo state of EGFR (A) and EGFRs associated with TAK-285 (B), W2P (C) and HKI-272 (D).

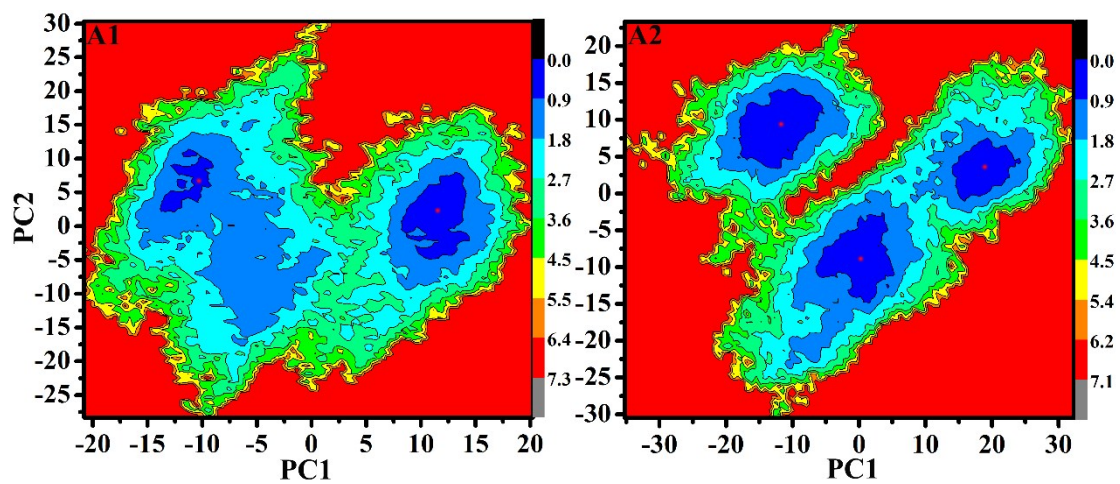

**Fig. S2** A1 and A2 respectively represent the free energy landscapes of the WT/mutated apo EGFRs constructed by projecting MD trajectories on the first two principal components PC1 and PC2.

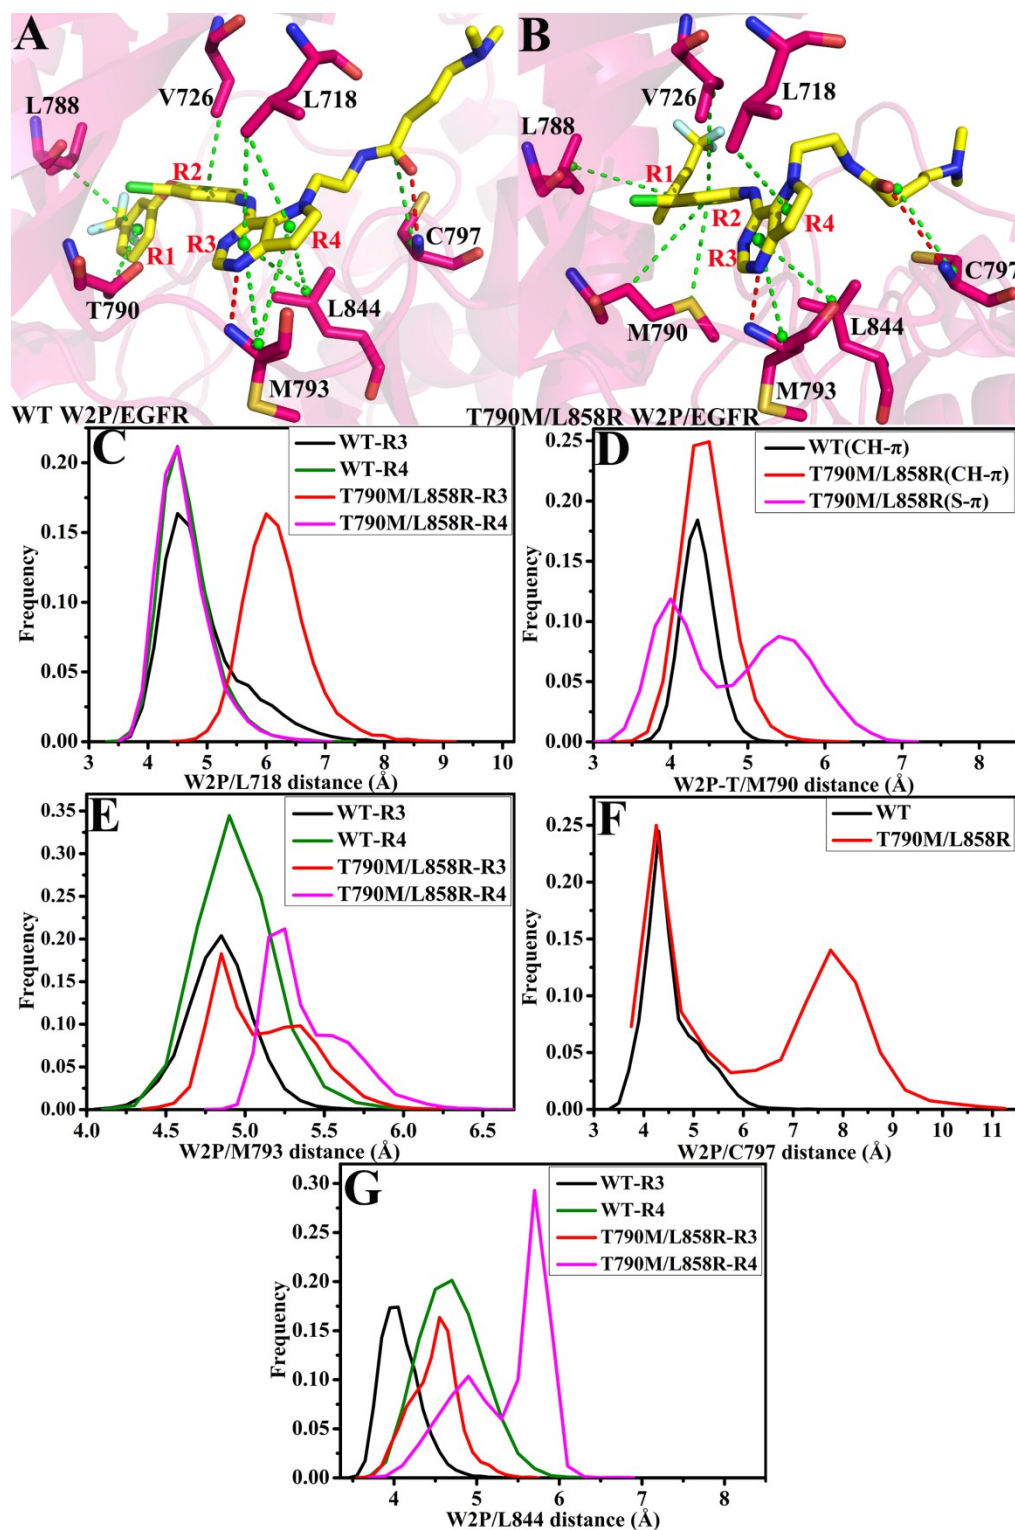

**Fig. S3** Geometric positions of inhibitor W2P relative to the key residues in the WT and mutated EGFRs and the hydrogen bonds are shown in the red line: (A/B) the WT/double mutant EGFRs associated with W2P. (C)-(G) depict the frequency distribution of distances between W2P and the key residues.

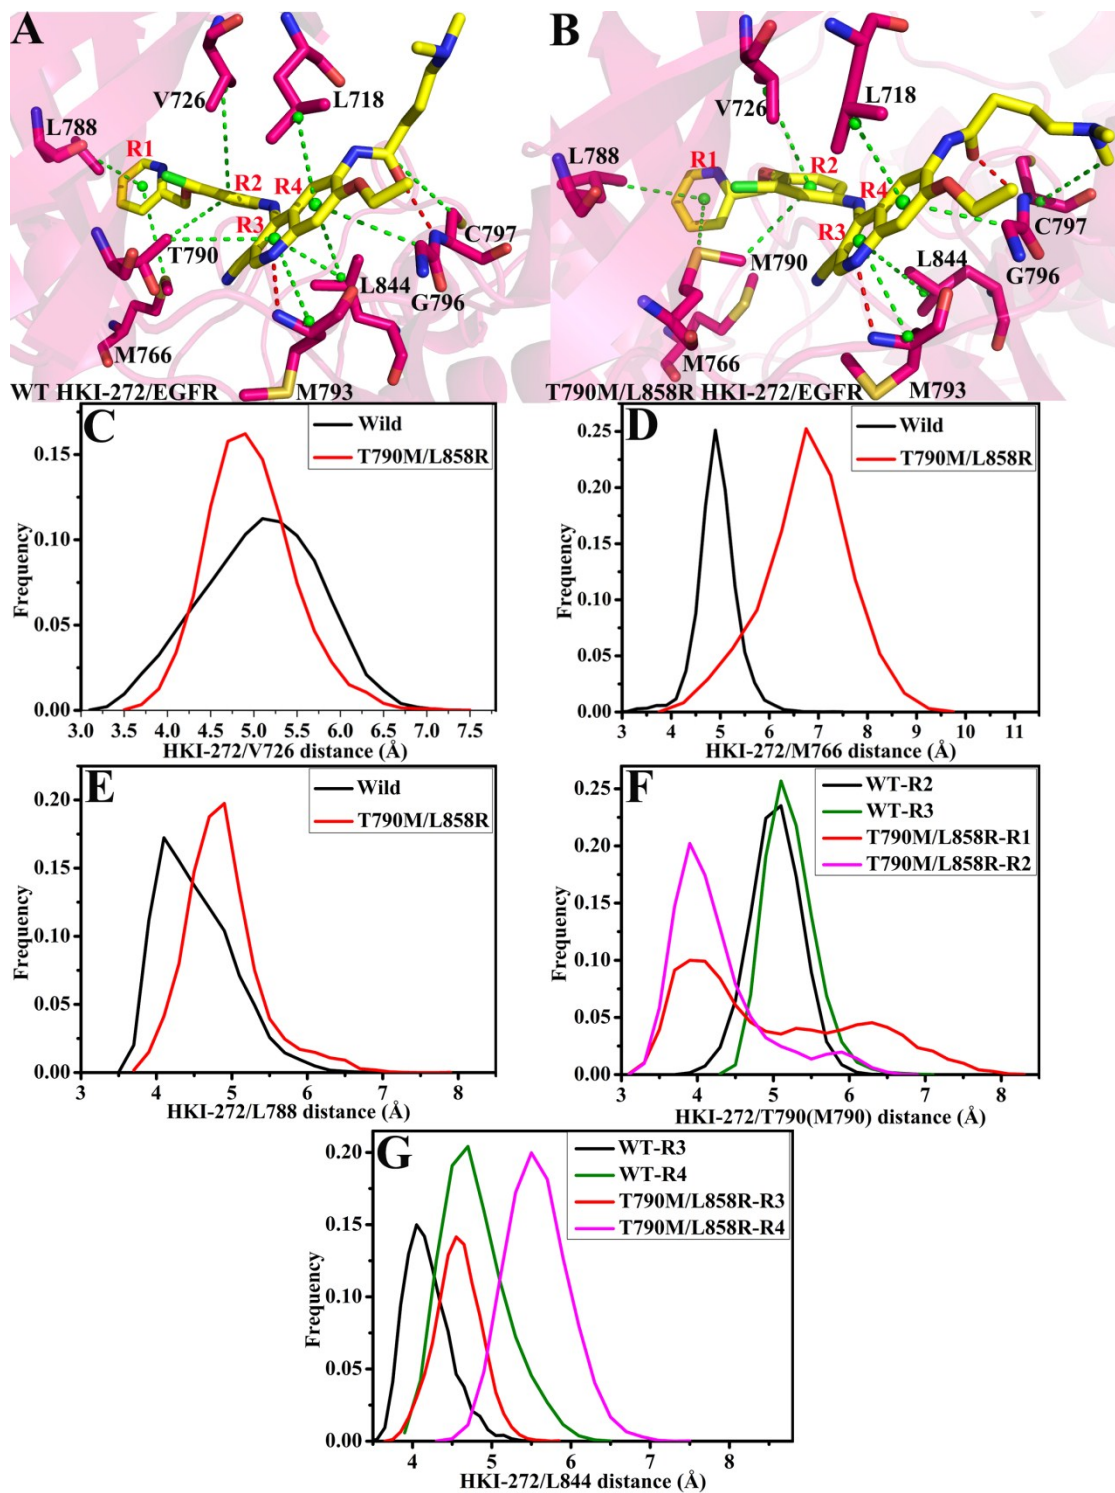

**Fig. S4** Geometric positions of inhibitor HKI-272 relative to the key residues in the WT and T790M/L858R EGFRs and the hydrogen bonds are shown in the red line: (A/B) the WT/double mutant EGFRs associated with HKI-272. (C)-(G) display the frequency distribution of distances between HKI-272 and the key residues.
